# Supplementary material
Source: MDPI journal article supplement (https://www.mdpi.com/2073-4441/14/8/1241)
Supplement: s1 [file s1]

# Increased Water Abstraction and Climate Change Have Substantial Effect on Morphometry, Salinity, and Biotic Communities in Lakes: Examples from the Semi-Arid Burdur Basin (Turkey)

Mehmet Arda Çolak <sup>1,\*</sup>, Barış Öztaş <sup>2</sup>, İbrahim Kaan Özgencil <sup>3,4</sup>, Melisa Soyluer <sup>3,4</sup>, Mustafa Korkmaz <sup>3,5</sup>, Arely Ramírez-García <sup>6,7</sup>, Melisa Metin <sup>7</sup>, Gültekin Yılmaz <sup>5</sup>, Serhat Ertuğrul <sup>5</sup>, Ülkü Nihan Tavşanoğlu <sup>8</sup>, Cihelio Alves Amorim <sup>7</sup>, Can Özen <sup>9</sup>, Meral Apaydın Yağcı <sup>10</sup>, Abdulkadir Yağcı <sup>10</sup>, Juan Pablo Pacheco <sup>11</sup>, Korhan Özkan <sup>5,9</sup>, Meryem Beklioğlu <sup>7,9</sup>, Erik Jeppesen <sup>5,7,9,12,13</sup> and Zuhul Akyürek <sup>1,2,9</sup>

<sup>1</sup> Department of Geodetic and Geographic Information Technologies, Middle East Technical University, 06800 Ankara, Turkey; zakyurek@metu.edu.tr

<sup>2</sup> Department of Civil Engineering, Middle East Technical University, 06800 Ankara, Turkey; baris.oztas@metu.edu.tr

<sup>3</sup> Department of Biological Sciences, Middle East Technical University, 06800 Ankara, Turkey; kaanozgencil@gmail.com (İ.K.Ö.); sylrmelisa@gmail.com (M.S.); korkmaz.hidro@gmail.com (M.K.)

<sup>4</sup> Simurg Bird Sanctuary, 06800 Ankara, Turkey

<sup>5</sup> Institute of Marine Sciences, Middle East Technical University, 33731 Mersin, Turkey; tekinims@gmail.com (G.Y.); serhatertugrul@gmail.com (S.E.); okorhan@metu.edu.tr (K.Ö.); ej@ecos.au.dk (E.J.)

<sup>6</sup> Programa Institucional de Doctorado en Ciencias Biológicas, Universidad Michoacana de San Nicolás de Hidalgo, 58000 Michoacán, Mexico; arelyr@umich.mx

<sup>7</sup> Limnology Laboratory, Department of Biological Sciences, Middle East Technical University 06800, Ankara, Turkey; melm1452@gmail.com (M.M.); alvescihelio@gmail.com (C.A.A.); meryem@metu.edu.tr (M.B.)

<sup>8</sup> Department of Biology, Çankırı Karatekin University, 18100 Çankırı, Turkey; unyazgan@gmail.com

<sup>9</sup> Centre for Ecosystem Research and Implementation (EKOSAM), Middle East Technical University, 06800 Ankara, Turkey; canozen@metu.edu.tr

<sup>10</sup> Department of Fisheries, Sheep Breeding Research Institute, Republic of Turkey Ministry of Agriculture and Forestry, 10200 Balıkesir, Turkey; meralyagci@gmail.com (M.A.Y.); a.k.yagci58@gmail.com (A.Y.)

<sup>11</sup> Centro Universitario de la Regional del Este (CURE), Universidad de la República, Maldonado, Uruguay; jp@ecos.au.dk

<sup>12</sup> Department of Ecoscience and Arctic Research Centre (ARC), Aarhus University, Silkeborg, Denmark

<sup>13</sup> Sino-Danish Centre for Education and Research (SDC), Beijing, China

\* Correspondence: arda.colak@metu.edu.tr

## BIRDS SUPPLEMENTARY MATERIAL

### Section S1. Breeding Bird Atlas Methodology

Turkish Breeding Bird atlas was conducted between 2014–2018 at the national scale [40]. The breeding season the Burdur Basin was defined as the period between the last week of March and mid-June, and it was divided into two periods: early breeding season and late breeding season. The main spatial unit used in the atlas was 50 × 50 km UTM grid squares. In each of these 50 × 50 km squares, two 10 × 10 km squares were surveyed by teams made up of a mixture of experts and volunteers. These 10 × 10 km squares were chosen to be different in terms of the habitat types they contain and to represent the habitat types present in the 50 × 50 km square. The teams walked two to four 1km-long line transects [104] in an hour in each 10 × 10 km square and recorded every species they saw or heard. The same breeding codes in [105] were used. In addition to the line transects, the teams also gathered data while moving between line transects. The teams conducted supplementary surveys in each 50 × 50 km if they believed they were missing some different habitats. We used the 50 × 50 km grid square data for our study because the atlas

data was made available only at scale. To filter the records from the  $50 \times 50$  km squares that fall within the basin boundaries, we visualized eBird data in ArcGIS Pro 2.3 [106] and retained only observations falling within the boundaries. We used all types of breeding records possible and confirmed-coded records [105] to be more inclusive because we realized that for some of the species, such as reed-nesting passerines (Passeriformes), the confirmed-coded records were lacking, resulting in a bias in the dataset. To tackle this problem, we present two numbers for the total number of breeding birds of the basin: one having species with all types of breeding records (i.e., including the possible-coded species) and another having only probable and confirmed-coded species.

### Section S2. Additional Sources Used for the White-headed Duck Case Study

The additional sources used to obtain all winter records of the species in the basin were [41,67,81,83,85,89,107–112].

### Section S3. Mid-winter Waterbird Survey Methodology

We used mid-winter waterbird census results for the years between 1967 and 2020 [43]. The censuses used point counts [104] from a fixed set of points, and the teams covered the whole surfaces of the wetlands in a single day. The censuses were conducted by experts. There were multiple gaps of no-count periods for most of the wetlands in the basin. We retained only the years for which we had survey data for all of the major wetlands in the region: Lake Burdur, Lake Acıgöl, Lake Salda, Lake Karataş, Lake Yarışlı, and Lake Ak.

### Section S4. Functional Diversity & Statistical Analyses

We used body mass (from [113]), foraging stratum (from [114]), foraging behaviour (from [115]), and diet (from [114]) to quantify the functional diversity of the wintering waterbird communities. We have followed Violle et al. [116] and Luck et al. [117] while we were choosing these functional traits. We calculated function diversity indices in R [118] by using *dbFD* function from *FD* package [119]. We calculated Functional Evenness (FEve; [44]). Non-binary numeric traits, which had different ranges and units, were standardized before functional diversity metrics were calculated [120]. Before the calculation of the FEve, we calculated the distances between the species by using new the “gawdis” method presented in [121], which can avoid the problem of disproportional contribution of some traits that happens when Gower distances are used. Before the calculation of the FEve with the *dbFD* function, we applied a dimensionality reduction (required for *min.species richness* > number of dimensions [120], which resulted in a 52.8% representation of the total variance. We used *glmmTMB* function from *glmmTMB* package [122] to model the effect of time (i.e., year) on FEve metrics. We used generalized linear models [45] with Gamma distributed errors. We used *testResiduals* function from *DHARMa* package [123] to check the model validity and its residuals. We also checked for autocorrelation in the residuals [124]. The model had no problems in its residuals and was a valid one.
